# Supplementary material for: 2D Z-scheme TiO2/SnS2 heterojunctions with enhanced visible-light photocatalytic performance for refractory contaminants and mechanistic insights
Source: Royal Society of Chemistry journal article supplement (doi:10.1039/d1nj02247d), 2021-01-01
Supplement: d1nj02247d1.pdf [file d1nj02247d1.pdf]

**Supplemental Materials for**  
**2D Z-scheme TiO<sub>2</sub>/SnS<sub>2</sub> Heterojunctions with Enhanced Visible-light**  
**Photocatalytic Performance for Refractory Contaminants and**  
**Mechanistic Insight**

Juan Gao<sup>a\*</sup>, Xiaowei Sun<sup>a</sup>, Lingcheng Zheng<sup>a\*</sup>, Gang He<sup>b\*</sup>, Yanfen Wang<sup>c</sup>, Yang Li<sup>a</sup>,  
Yin Liu<sup>c,d</sup>, Jiale Deng<sup>a</sup>, Mei Liu<sup>a</sup>

*<sup>a</sup> School of Mechanics and Photoelectric Physics, Anhui University of Science and Technology, Huainan 232001, P. R. China*

*<sup>b</sup> School of Physics and Materials Science, Anhui University, Hefei 230601, P. R. China*

*<sup>c</sup> School of Materials Science and Engineering, Anhui University of Science and Technology, Huainan 232001, PR China*

*<sup>d</sup> Anhui International Joint Research Center for Nano Carbon-based Materials and Environmental Health, Hefei 230601, P. R. China*

---

\* Email: [gaojuanphys@126.com](mailto:gaojuanphys@126.com), [lczheng@aust.edu.cn](mailto:lczheng@aust.edu.cn), [hegang@ahu.edu.cn](mailto:hegang@ahu.edu.cn)

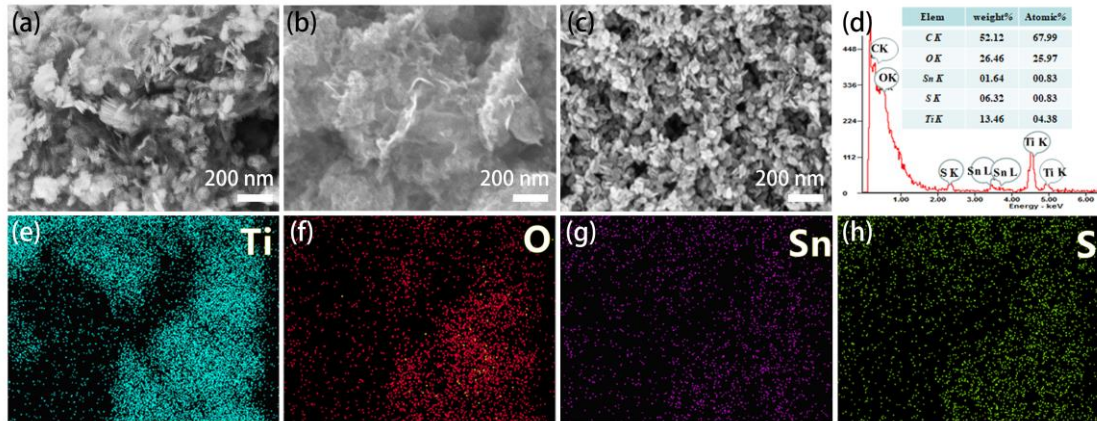

Fig. S1 (a-c) SEM images of the  $\text{TiO}_2$ ,  $\text{SnS}_2$  and  $\text{TOSS}_{0.15}$ , (d) EDS spectrum of  $\text{TOSS}_{0.15}$  and (e-h) Ti, Sn, S and O element mapping images of  $\text{TOSS}_{0.15}$ .

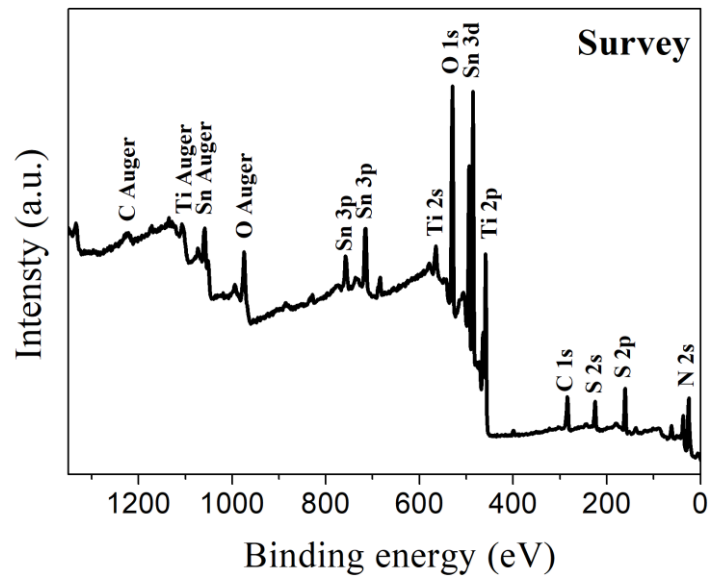

Fig. S2 Full survey of XPS spectrum of  $\text{TOSS}_{0.15}$ .

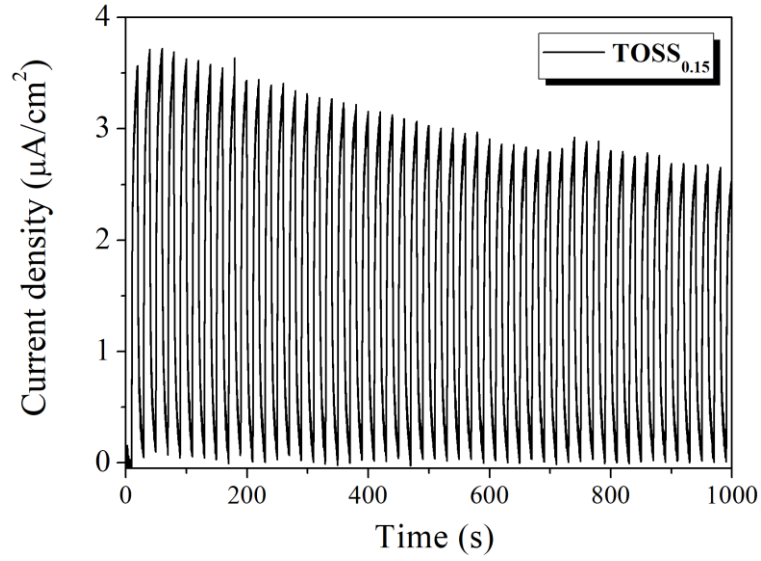

Fig. S3 J-T curves for TOSS<sub>0.15</sub> under chopped light.

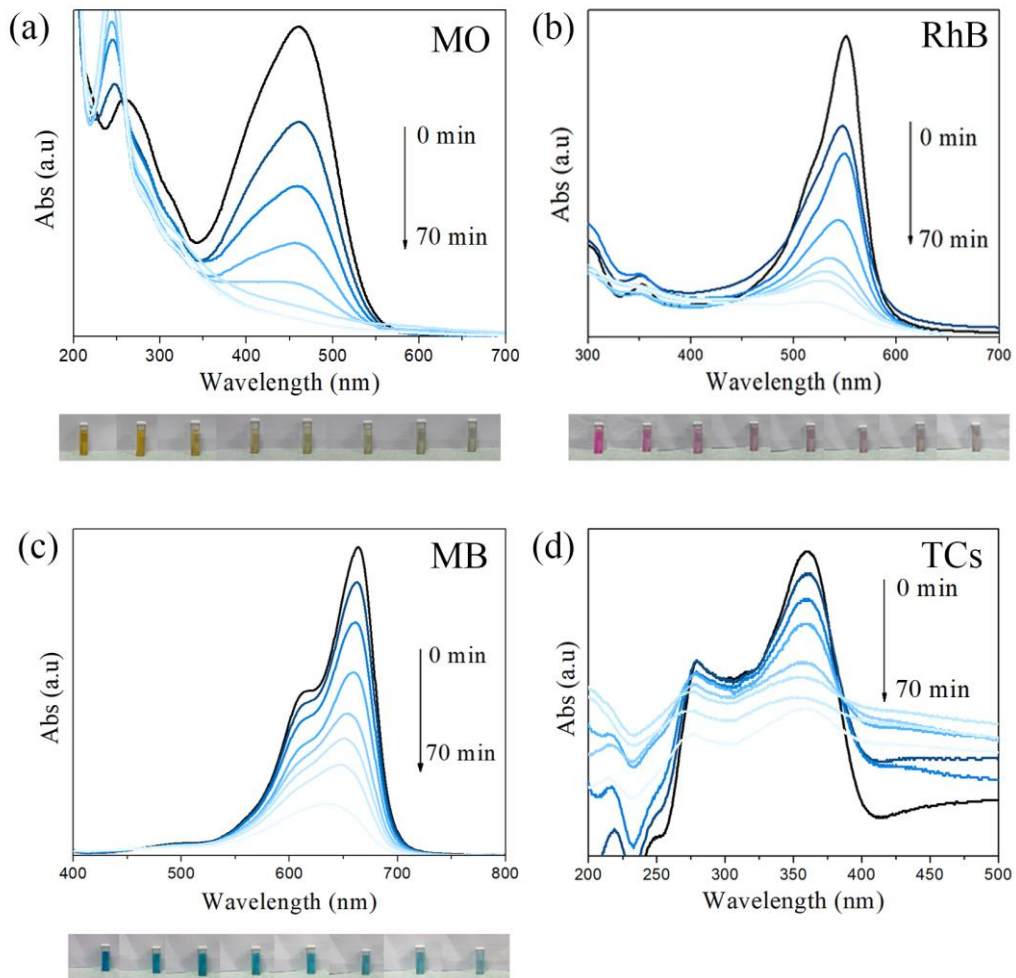

Fig. S4 UV-Vis absorption spectrum of (a) MO, (b) RhB, (c) MB and (d) TCs and the corresponding photos of the contaminants at different irradiation time.

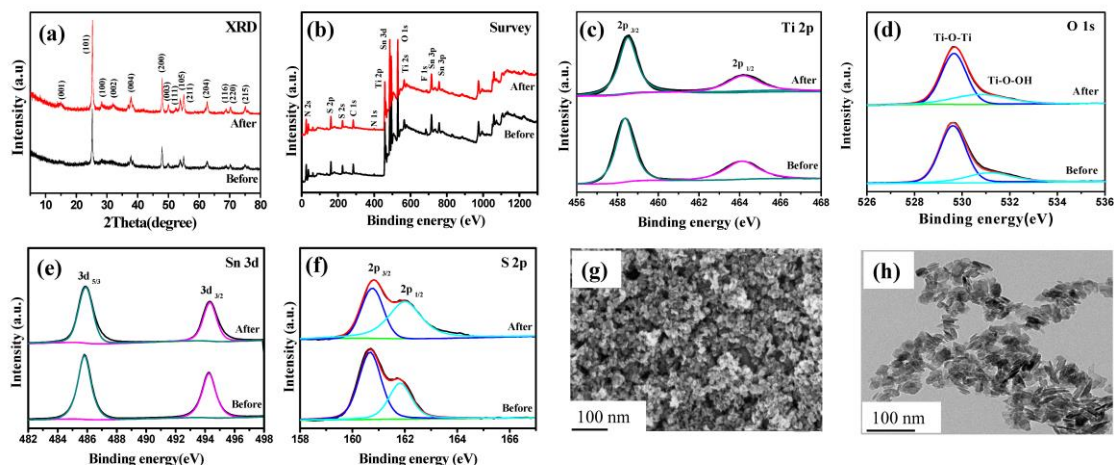

Fig. S5 (a) XRD spectra, (b) survey, (c) Ti 2p, (d) O 1s, (e) Sn 3d and (f) S 2p core level spectra of TOSS<sub>0.15</sub> sample before and after photodegradation, (g) SEM and (h) image of TOSS<sub>0.15</sub> sample after photodegradation.

Table S1. Comparison of the photocatalytic performance of the TiO<sub>2</sub>/SnS<sub>2</sub> composite prepared with different experimental conditions (all the photodegradation time is 50 min).

| Mass of TOSS | Contaminants | concentration   | Degradation rate (%) | K (min <sup>-1</sup> ) | References |
|--------------|--------------|-----------------|----------------------|------------------------|------------|
| 15 mg        | MO           | 100 mL 0.03 mM  | 98.3                 | 0.057                  | This work  |
|              | RhB          | 100 mL 10 mg/L  | 82.9                 | 0.022                  |            |
|              | MB           | 100 mL 0.012 mM | 79.4                 | 0.020                  |            |
|              | TCs          | 100 mL 10 mg/L  | 71.0                 | 0.016                  |            |
| 100 mg       | MO           | 25 mL 13 mg/mL  | 90.9                 | 0.055                  | Ref. 36    |
| 70 mg        | RhB          | 70 mL 10 mg/mL  | 71.0                 | 0.035                  | Ref. 38    |
| 20 mg        | MB           | 100 mL 0.02 mM  | 80.0                 | 0.015                  | Ref. 37    |
